# Supplementary material for: Preparation, Characterization, and Antioxidant Properties of Selenium-Enriched Tea Peptides
Source: MDPI journal article supplement (doi:10.3390/foods12224105), 2023-11-12
Supplement: s1 [file s1]

**Table S1** Enzymatic hydrolysis parameters of Se-TPs

| Enzyme category | Substrate<br>concentration (%) | pH  | Temperature<br>(°C) | Enzyme<br>content (U) |
|-----------------|--------------------------------|-----|---------------------|-----------------------|
| Alcalase        | 3                              | 9   | 55                  | 5000                  |
| Neutrase        | 3                              | 7   | 40                  | 5000                  |
| Papain          | 3                              | 6.5 | 55                  | 5000                  |
| Trypsin         | 3                              | 7.5 | 37                  | 5000                  |

**Table S2** CCD design factor levels for the Se-TP hydrolysis method optimization

| Factors           | Levels |      |      |      |      |
|-------------------|--------|------|------|------|------|
|                   | -2     | -1   | 0    | 1    | -2   |
| pH                | 5.5    | 6.25 | 7    | 7.75 | 8.5  |
| T (°C)            | 45     | 50   | 55   | 60   | 65   |
| U (U/g of Se-TPs) | 500    | 1250 | 2000 | 2750 | 3500 |
| T (h)             | 1      | 2.25 | 3.5  | 4.75 | 6    |

**Table S3** Four-factor, five-level CCD design for the Se-TP hydrolysis method optimization and the investigated response for the experimental results

| Number | pH             | Temperature<br>(°C) | Enzyme concentration<br>(U/g) | Time<br>(h)    | OH• scavenging (%) |
|--------|----------------|---------------------|-------------------------------|----------------|--------------------|
|        | X <sub>1</sub> | X <sub>2</sub>      | X <sub>3</sub>                | X <sub>4</sub> |                    |
| 1      | 6.25           | 50.00               | 1250.00                       | 2.25           | 50.21              |
| 2      | 7.75           | 50.00               | 1250.00                       | 2.25           | 57.15              |
| 3      | 6.25           | 60.00               | 1250.00                       | 2.25           | 59.91              |
| 4      | 7.75           | 60.00               | 1250.00                       | 2.25           | 62.55              |
| 5      | 6.25           | 50.00               | 2750.00                       | 2.25           | 54.14              |
| 6      | 7.75           | 50.00               | 2750.00                       | 2.25           | 60.53              |
| 7      | 6.25           | 60.00               | 2750.00                       | 2.25           | 48.50              |
| 8      | 7.75           | 60.00               | 2750.00                       | 2.25           | 53.53              |
| 9      | 6.25           | 50.00               | 1250.00                       | 4.75           | 58.26              |
| 10     | 7.75           | 50.00               | 1250.00                       | 4.75           | 57.40              |

|       |      |       |         |      |       |
|-------|------|-------|---------|------|-------|
| 11    | 6.25 | 60.00 | 1250.00 | 4.75 | 59.79 |
| 12    | 7.75 | 60.00 | 1250.00 | 4.75 | 57.46 |
| 13    | 6.25 | 50.00 | 2750.00 | 4.75 | 60.53 |
| 14    | 7.75 | 50.00 | 2750.00 | 4.75 | 61.76 |
| 15    | 6.25 | 60.00 | 2750.00 | 4.75 | 50.03 |
| 16    | 7.75 | 60.00 | 2750.00 | 4.75 | 60.22 |
| 17    | 5.50 | 55.00 | 2000.00 | 3.50 | 58.69 |
| 18    | 8.50 | 55.00 | 2000.00 | 3.50 | 65.07 |
| 19    | 7.00 | 45.00 | 2000.00 | 3.50 | 62.25 |
| 20    | 7.00 | 65.00 | 2000.00 | 3.50 | 60.47 |
| 21    | 7.00 | 55.00 | 500.00  | 3.50 | 62.25 |
| 22    | 7.00 | 55.00 | 3500.00 | 3.50 | 55.62 |
| 23    | 7.00 | 55.00 | 2000.00 | 1.00 | 57.58 |
| 24    | 7.00 | 55.00 | 2000.00 | 6.00 | 47.82 |
| 25-30 | 7.00 | 55.00 | 2000.00 | 3.50 | 66.30 |

**Table S4** ANOVA for the response surface quadratic model

| Source                        | Sum of Squares | df | Mean Square | F value | P value |
|-------------------------------|----------------|----|-------------|---------|---------|
| Model                         | 735.75         | 14 | 52.55       | 5.73    | 0.0009  |
| X <sub>1</sub>                | 73.46          | 1  | 73.46       | 8.00    | 0.0127  |
| X <sub>2</sub>                | 5.55           | 1  | 5.55        | 0.60    | 0.4489  |
| X <sub>3</sub>                | 29.85          | 1  | 29.85       | 3.25    | 0.0915  |
| X <sub>4</sub>                | 0.016          | 1  | 0.016       | 0.0017  | 0.9676  |
| X <sub>1</sub> X <sub>2</sub> | 0.21           | 1  | 0.21        | 0.023   | 0.8812  |
| X <sub>1</sub> X <sub>3</sub> | 16.92          | 1  | 16.92       | 1.84    | 0.1947  |
| X <sub>1</sub> X <sub>4</sub> | 10.19          | 1  | 10.19       | 1.11    | 0.3087  |
| X <sub>2</sub> X <sub>3</sub> | 106.99         | 1  | 106.99      | 11.66   | 0.0038  |
| X <sub>2</sub> X <sub>4</sub> | 10.39          | 1  | 10.39       | 1.13    | 0.3043  |
| X <sub>3</sub> X <sub>4</sub> | 10.19          | 1  | 10.19       | 1.11    | 0.3087  |
| X <sub>1</sub> <sup>2</sup>   | 53.11          | 1  | 53.11       | 5.79    | 0.0295  |
| X <sub>2</sub> <sup>2</sup>   | 63.53          | 1  | 63.53       | 6.92    | 0.0189  |
| X <sub>3</sub> <sup>2</sup>   | 124.22         | 1  | 124.22      | 13.53   | 0.0022  |

|             |        |    |        |       |          |
|-------------|--------|----|--------|-------|----------|
| $X_4^2$     | 372.62 | 1  | 372.62 | 40.60 | < 0.0001 |
| Residual    | 137.68 | 15 | 9.18   |       |          |
| Lack of fit | 137.68 | 10 | 13.77  |       |          |
| R-Squared   | 0.8423 |    |        |       |          |
| Pure error  | 0.000  | 5  | 0.000  |       |          |
| Cor total   | 873.43 | 29 |        |       |          |

---
